# Supplementary material for: Functional and Structural Leaf Plasticity Determine Photosynthetic Performances during Drought Stress and Recovery in Two Platanus orientalis Populations from Contrasting Habitats
Source: PubMed Central journal article supplement (PMC7312932; doi:10.3390/ijms21113912), 2020-05-30
Supplement: ijms-21-03912-s001.pdf [file ijms-21-03912-s001.pdf]

**Table S1.** Values for the degree of agreement  $\mu_{C_k, C_l}$  between the leaf anatomical and physiological parameters determined in Italian (IT) and Bulgarian (BG) populations of *P. orientalis* plants under control (FTSW = 95%) and drought (FTSW = 28%) conditions. LT – leaf thickness, PP – palisade parenchyma, SP – spongy parenchyma, AdE – adaxial epidermis, AbE – abaxial epidermis, InS – intercellular space,  $A_{\text{sat}}$  – CO<sub>2</sub> saturated photosynthetic rate,  $V_{\text{cmax}}$  – maximum carboxylation rate of Rubisco,  $J_{\text{max}}$  – maximum rate of photosynthetic electron transport, TPU – triose phosphate utilization,  $v_c$  – carboxylation rate,  $v_o$  – oxygenation rate,  $R_p$  – photorespiration,  $g_m$  - mesophyll conductance. The IT population data are shown in upper triangle of the table, while those for BG population – in the lower triangle. The degrees of agreement showing positive correlations are presented in blue color, those showing the negative correlations – in red color.

| $\mu_{C_k, C_l}$                    | LT          | PP          | SP   | AdE         | AbE  | InS  | $A_{\text{sat}}$ | $V_{\text{cmax}}$ | $J_{\text{max}}$ | TPU         | $v_c$       | $v_o$       | $R_p$       | $g_m$       |
|-------------------------------------|-------------|-------------|------|-------------|------|------|------------------|-------------------|------------------|-------------|-------------|-------------|-------------|-------------|
| <b>LT</b>                           |             | <b>0.82</b> | 0.7  | 0.61        | 0.52 | 0.35 | 0.68             | <b>0.85</b>       | <b>0.76</b>      | 0.71        | <b>0.86</b> | <b>0.20</b> | <b>0.17</b> | 0.71        |
| <b>PP</b>                           | 0.71        |             | 0.7  | 0.52        | 0.48 | 0.44 | 0.65             | 0.7               | 0.67             | 0.65        | 0.74        | <b>0.14</b> | <b>0.17</b> | 0.71        |
| <b>SP</b>                           | 0.59        | 0.55        |      | 0.47        | 0.45 | 0.35 | <b>0.80</b>      | <b>0.82</b>       | <b>0.79</b>      | <b>0.77</b> | 0.62        | <b>0.20</b> | <b>0.2</b>  | <b>0.80</b> |
| <b>AdE</b>                          | 0.71        | 0.73        | 0.48 |             | 0.42 | 0.45 | 0.47             | 0.58              | 0.58             | 0.52        | 0.65        | 0.45        | 0.45        | 0.45        |
| <b>AbE</b>                          | 0.55        | 0.38        | 0.62 | 0.44        |      | 0.59 | 0.5              | 0.45              | 0.42             | 0.44        | 0.47        | 0.56        | 0.5         | 0.55        |
| <b>InS</b>                          | 0.55        | 0.65        | 0.5  | 0.44        | 0.52 |      | <b>0.15</b>      | 0.29              | <b>0.17</b>      | <b>0.21</b> | 0.27        | 0.61        | 0.58        | 0.33        |
| <b><math>A_{\text{sat}}</math></b>  | <b>0.79</b> | <b>0.89</b> | 0.56 | 0.65        | 0.42 | 0.67 |                  | <b>0.80</b>       | <b>0.86</b>      | <b>0.83</b> | 0.7         | 0.3         | 0.33        | <b>0.77</b> |
| <b><math>V_{\text{cmax}}</math></b> | <b>0.76</b> | 0.71        | 0.5  | <b>0.80</b> | 0.39 | 0.45 | <b>0.76</b>      |                   | <b>0.85</b>      | <b>0.83</b> | <b>0.80</b> | <b>0.23</b> | <b>0.23</b> | <b>0.80</b> |
| <b><math>J_{\text{max}}</math></b>  | <b>0.77</b> | <b>0.85</b> | 0.58 | <b>0.76</b> | 0.35 | 0.56 | <b>0.83</b>      | 0.74              |                  | <b>0.92</b> | <b>0.77</b> | 0.32        | 0.35        | 0.74        |
| <b>TPU</b>                          | <b>0.77</b> | <b>0.80</b> | 0.55 | <b>0.76</b> | 0.35 | 0.55 | <b>0.82</b>      | <b>0.76</b>       | <b>0.95</b>      |             | 0.74        | 0.32        | 0.35        | <b>0.76</b> |
| <b><math>v_c</math></b>             | <b>0.82</b> | 0.74        | 0.53 | <b>0.77</b> | 0.48 | 0.52 | <b>0.76</b>      | 0.73              | <b>0.83</b>      | <b>0.86</b> |             | 0.27        | <b>0.24</b> | 0.71        |
| <b><math>v_o</math></b>             | 0.41        | 0.55        | 0.58 | 0.42        | 0.5  | 0.59 | 0.53             | 0.47              | 0.42             | 0.38        | 0.32        |             | <b>0.94</b> | 0.32        |
| <b><math>R_p</math></b>             | 0.41        | 0.55        | 0.58 | 0.42        | 0.5  | 0.59 | 0.53             | 0.47              | 0.42             | 0.38        | 0.32        | <b>1.00</b> |             | 0.26        |
| <b><math>g_m</math></b>             | 0.73        | 0.7         | 0.41 | <b>0.76</b> | 0.35 | 0.5  | 0.7              | 0.74              | <b>0.76</b>      | <b>0.77</b> | <b>0.76</b> | 0.32        | 0.32        |             |

**Table S2.** Values for the degree of disagreement  $v_{C_k, C_l}$  between the leaf anatomical and physiological parameters determined in Italian (IT) and Bulgarian (BG) populations of *P. orientalis* plants under control (FTSW = 95%) and drought (FTSW = 28%) conditions. LT – leaf thickness, PP – palisade parenchyma, SP – spongy parenchyma, AdE – adaxial epidermis, AbE – abaxial epidermis, InS – intercellular space,  $A_{sat}$  – CO<sub>2</sub> saturated photosynthetic rate,  $V_{cmax}$  – maximum carboxylation rate of Rubisco,  $J_{max}$  – maximum rate of photosynthetic electron transport, TPU – triose phosphate utilization,  $v_c$  – carboxylation rate,  $v_o$  – oxygenation rate,  $R_p$  – photorespiration,  $g_m$  - mesophyll conductance. The IT population data are shown in upper triangle of the table, while those for BG population – in the lower triangle. The degrees of disagreement are presented in the same colours as the corresponding values of the degree of agreement.

| $v_{C_k, C_l}$ | LT   | PP   | SP   | AdE  | AbE  | InS  | $A_{sat}$ | $V_{cmax}$ | $J_{max}$ | TPU  | $v_c$ | $v_o$ | $R_p$ | $g_m$ |
|----------------|------|------|------|------|------|------|-----------|------------|-----------|------|-------|-------|-------|-------|
| LT             |      | 0.18 | 0.3  | 0.38 | 0.48 | 0.65 | 0.32      | 0.15       | 0.24      | 0.27 | 0.14  | 0.80  | 0.83  | 0.27  |
| PP             | 0.29 |      | 0.3  | 0.47 | 0.52 | 0.56 | 0.35      | 0.3        | 0.33      | 0.33 | 0.26  | 0.86  | 0.83  | 0.27  |
| SP             | 0.41 | 0.45 |      | 0.52 | 0.55 | 0.65 | 0.20      | 0.18       | 0.21      | 0.21 | 0.38  | 0.80  | 0.80  | 0.18  |
| AdE            | 0.29 | 0.27 | 0.52 |      | 0.56 | 0.53 | 0.52      | 0.41       | 0.41      | 0.45 | 0.33  | 0.53  | 0.53  | 0.52  |
| AbE            | 0.45 | 0.62 | 0.38 | 0.56 |      | 0.41 | 0.50      | 0.55       | 0.58      | 0.55 | 0.53  | 0.44  | 0.5   | 0.44  |
| InS            | 0.45 | 0.35 | 0.5  | 0.56 | 0.48 |      | 0.85      | 0.71       | 0.83      | 0.77 | 0.73  | 0.39  | 0.42  | 0.65  |
| $A_{sat}$      | 0.21 | 0.11 | 0.44 | 0.35 | 0.58 | 0.33 |           | 0.20       | 0.14      | 0.15 | 0.3   | 0.7   | 0.67  | 0.21  |
| $V_{cmax}$     | 0.24 | 0.29 | 0.5  | 0.20 | 0.61 | 0.55 | 0.24      |            | 0.15      | 0.15 | 0.20  | 0.77  | 0.77  | 0.18  |
| $J_{max}$      | 0.23 | 0.15 | 0.42 | 0.24 | 0.65 | 0.44 | 0.17      | 0.26       |           | 0.06 | 0.23  | 0.68  | 0.65  | 0.24  |
| TPU            | 0.21 | 0.18 | 0.44 | 0.23 | 0.64 | 0.44 | 0.17      | 0.23       | 0.03      |      | 0.24  | 0.67  | 0.64  | 0.21  |
| $v_c$          | 0.18 | 0.26 | 0.47 | 0.23 | 0.52 | 0.48 | 0.24      | 0.27       | 0.17      | 0.12 |       | 0.73  | 0.76  | 0.27  |
| $v_o$          | 0.59 | 0.45 | 0.42 | 0.58 | 0.5  | 0.41 | 0.47      | 0.53       | 0.58      | 0.61 | 0.68  |       | 0.06  | 0.67  |
| $R_p$          | 0.59 | 0.45 | 0.42 | 0.58 | 0.5  | 0.41 | 0.47      | 0.53       | 0.58      | 0.61 | 0.68  | 0     |       | 0.73  |
| $g_m$          | 0.18 | 0.21 | 0.5  | 0.15 | 0.56 | 0.41 | 0.21      | 0.17       | 0.15      | 0.12 | 0.15  | 0.59  | 0.59  |       |
